# Supplementary material for: Multifunctional dual-crosslinked Ti3C2Tx MXene-based hydrogels for wearable sensors with enhanced mechanical robustness and broadband microwave absorption
Source: Royal Society of Chemistry journal article supplement (doi:10.1039/d5ta00035a), 2025-01-01
Supplement: d5ta00035a1.pdf [file d5ta00035a1.pdf]

1 **Supporting Information**  
2 **Multifunctional Dual Crosslinked  $Ti_3C_2T_x$  MXene**  
3 **Based Hydrogels for Wearable Sensors with Enhanced**  
4 **Mechanical Robustness and Broadband Microwave**  
5 **Absorption**

6

7 *Chen Su<sup>a,b,c#</sup>, Mingyu Li<sup>a#</sup>, Shuai Zhang<sup>a</sup>, Weiqing Liu<sup>a</sup>, Yuanzhang Wang<sup>a</sup>,*

8 *Peipei Li<sup>a</sup>, Huanran Feng<sup>a</sup>, Mingshui Yao<sup>d</sup>, Weiwei Wu<sup>a,b,c\*</sup>, Lu Zhang<sup>a,b,c\*</sup>*

9

10 <sup>a</sup>Interdisciplinary Research Center of Smart Sensors, Shaanxi Key Laboratory of

11 High-Orbits-Electron Materials and Protection Technology for Aerospace, School of

12 Advanced Materials and Nanotechnology, Xidian University, Shaanxi, 710126, P.R.

13 China

14 <sup>b</sup>State Key Laboratory of Electromechanical Integrated Manufacturing of High-

15 performance Electronic Equipments, Xidian University, Shaanxi, 710126, P.R. China

16 <sup>c</sup>Key Laboratory of Artificial Olfaction of Shaanxi Higher Education Institutes,

17 Xidian University, Shaanxi, 710126, P.R. China

18 <sup>d</sup>State Key Laboratory of Mesoscience and Engineering, Institute of Process

19 Engineering, Chinese Academy of Sciences, Beijing, 100190, P.R. China

20 \*Corresponding authors. E-mail addresses: [wwwu@xidian.edu.cn](mailto:wwwu@xidian.edu.cn) (Weiwei Wu);

21 [zhanglu17@xidian.edu.cn](mailto:zhanglu17@xidian.edu.cn) (Lu Zhang)

22

23

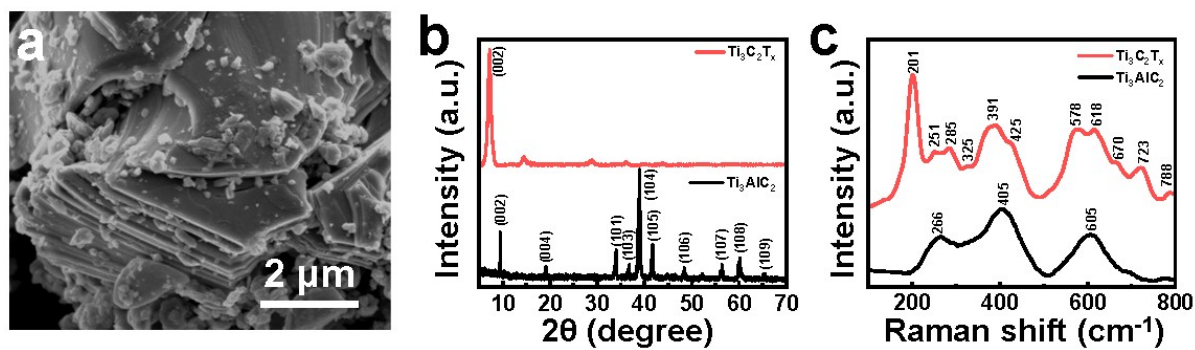

24

25 **Fig. S1** (a) SEM images of  $\text{Ti}_3\text{AlC}_2$  MAX phase. (b) XRD patterns of  $\text{Ti}_3\text{C}_2\text{T}_x$  MXene  
 26 and  $\text{Ti}_3\text{AlC}_2$  MAX phase. (c) Raman spectrum of  $\text{Ti}_3\text{C}_2\text{T}_x$  MXene and  $\text{Ti}_3\text{AlC}_2$  MAX  
 27 phase.

28

29

30

31

32

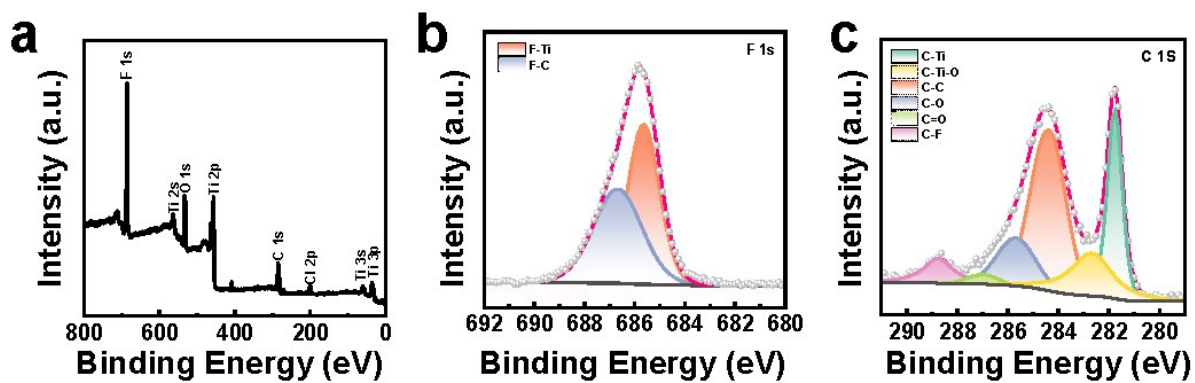

33 **Fig. S2** XPS spectra of (a) full survey scan, (b) F 1s, (c) C 1s for  $\text{Ti}_3\text{C}_2\text{T}_x$ .

34

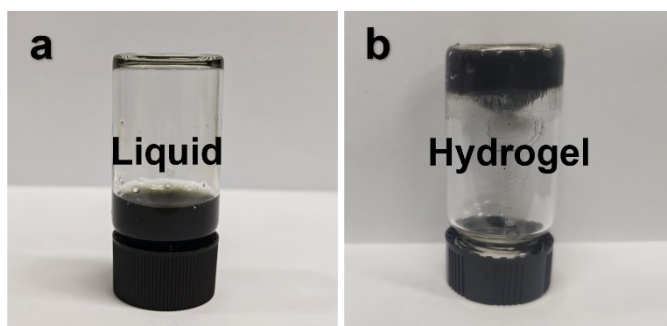

35 **Fig. S3** The optical images of PMP1 hydrogel (a) before and (b) after directional  
 36 freezing process.

37

38

39

40

41 **Table S1** The EDS elemental composition table of directional PMP1 hydrogel.

| <b>Element</b> | <b>Wt%</b> | <b>At%</b> |
|----------------|------------|------------|
| Ti             | 1.31       | 0.37       |
| C              | 63.86      | 72.63      |
| O              | 28.06      | 23.96      |
| F              | 0.42       | 0.30       |
| S              | 6.19       | 2.64       |
| Na             | 0.17       | 0.10       |

42

43

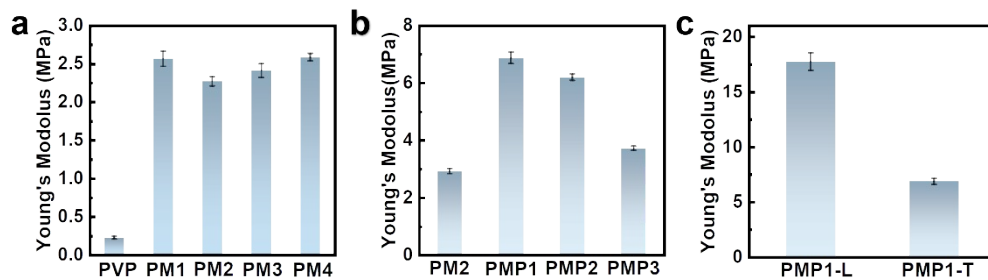

44 **Fig. S4** Calculated Young's modulus for directional frozen hydrogels (a) with different  
 45 contents of MXene, (b) with different PSS contents, (c) under transverse and  
 46 longitudinal stress.

47  
 48  
 49  
 50  
 51  
 52  
 53

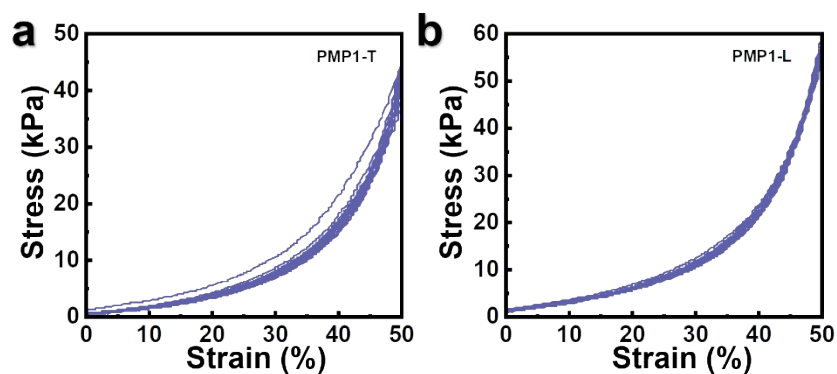

54  
 55 **Fig. S5** Compressive stress-strain curves of directional PMP1 hydrogel in the (a)  
 56 transverse and (b) longitudinal directions.

57

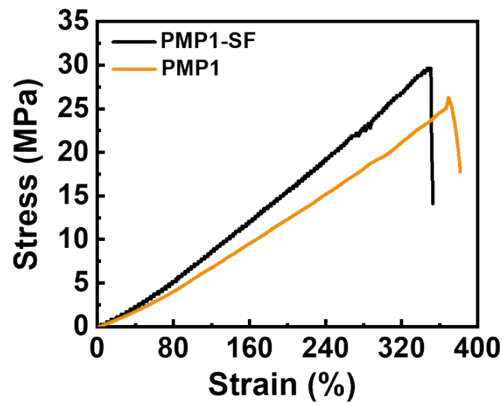

58 **Fig. S6** Comparative mechanical performance of PMP1 and PMP1-SF hydrogels.  
 59 Tensile stress-strain curves demonstrate that PMP1-SF exhibits a slightly higher  
 60 Young's modulus than PMP1.

61  
 62  
 63  
 64

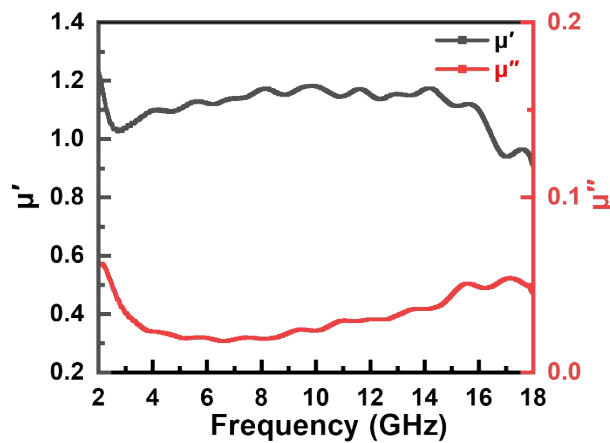

65  
 66 **Fig. S7** Frequency-dependent complex permeability characteristics of the directional  
 67 PMP1-SF hydrogel. The real part of permeability ( $\mu'$ ) remains nearly 1.0 over the 2–  
 68 18 GHz frequency range, while (b) the imaginary part ( $\mu''$ ) is close to 0.0, indicating  
 69 negligible magnetic loss.

70

71 **Table S2** Microwave absorption performance of  $Ti_3C_2T_x$  MXene-based microwave  
 72 absorption materials

73

| Materials                                                    | $RL_{min}$ (dB)                     | EAB ( $RL \leq -10$ dB) |             | Refs.            |
|--------------------------------------------------------------|-------------------------------------|-------------------------|-------------|------------------|
|                                                              |                                     | Value (GHz)             | d (mm)      |                  |
| $Ti_3C_2T_x$ MXenes                                          | -27.5@17.10 GHz<br>@4.00 mm         | 3.00                    | 2.00        | [1]              |
| MXene/PI aerogel                                             | -45.4@9.59 GHz<br>@3.00 mm          | 5.10                    | 2.00        | [2]              |
| MXene/PEO aerogel                                            | -50.8@6.72 GHz<br>@1.70 mm          | 5.20                    | 1.70        | [3]              |
| Anisotropic MXene/polyimide aerogel                          | -41.8@6.00 GHz<br>@4.00 mm          | 6.50                    | 1.91        | [4]              |
| $Ti_3C_2T_x$ /PPy                                            | -49.2@8.50 GHz<br>@3.20 mm          | 4.90                    | 3.20        | [5]              |
| MXene/MoS <sub>2</sub> heterostructure                       | -46.72@4.32 GHz<br>@2.00 mm         | 4.32                    | 2.00        | [6]              |
| porous MXene/CNTs microspheres                               | -45 dB@10.00 GHz<br>@2.70 mm        | 4.90                    | 1.90        | [7]              |
| MXene/CNTs/PI aerogel                                        | -50.03@13.70 GHz<br>@1.80mm         | 5.60                    | 1.80        | [8]              |
| MXene@RGO aerogel                                            | -31.2@8.00 GHz<br>@3.05 mm          | 5.40                    | 2.05        | [9]              |
| <b>Directional PVA/<math>Ti_3C_2T_x</math>/PSS hydrogels</b> | <b>-55.5@10.73 GHz<br/>@2.50 mm</b> | <b>6.34</b>             | <b>2.00</b> | <b>This work</b> |

74

75

76

77 **References**

78 [1] G. Cui, X. Sun, G. Zhang, Z. Zhang, H. Liu, J. Gu, G. Gu, Electromagnetic absorption performance  
 79 of two-dimensional MXene  $Ti_3C_2T_x$  exfoliated by HCl + LiF etchant with diverse etching times, Mater.  
 80 Lett. 252 (2019) 8-10.

81 [2] J. Liu, H.B. Zhang, X. Xie, R. Yang, Z. Liu, Y. Liu, Z.Z. Yu, Multifunctional, Superelastic, and  
 82 Lightweight MXene/Polyimide Aerogels, Small 14(45) (2018) e1802479.

83 [3] X. Zhou, S. Li, M. Zhang, X. Yuan, J. Wen, H. Xi, H. Wu, X. Ma, MXene/PEO aerogels with two-  
 84 hierarchically porous architecture for electromagnetic wave absorption, Carbon 204 (2023) 538-546.

85 [4] Y. Dai, X. Wu, Z. Liu, H.-B. Zhang, Z.-Z. Yu, Highly sensitive, robust and anisotropic MXene  
 86 aerogels for efficient broadband microwave absorption, Composites, Part B 200 (2020) 108263.

87 [5] Y. Tong, M. He, Y. Zhou, X. Zhong, L. Fan, T. Huang, Q. Liao, Y. Wang, Hybridizing polypyrrole  
 88 chains with laminated and two-dimensional  $Ti_3C_2T_x$  toward high-performance electromagnetic wave  
 89 absorption, Appl. Surf. Sci. 434 (2018) 283-293.

90 [6] X. Li, C. Wen, L. Yang, R. Zhang, Y. Li, R. Che, Enhanced visualizing charge distribution of 2D/2D  
 91 MXene/MoS<sub>2</sub> heterostructure for excellent microwave absorption performance, J. Alloys Compd. 869

92 (2021) 159365.  
93 [7] Y. Cui, F. Wu, J. Wang, Y. Wang, T. Shah, P. Liu, Q. Zhang, B. Zhang, Three dimensional porous  
94 MXene/CNTs microspheres: Preparation, characterization and microwave absorbing properties,  
95 Composites, Part A 145 (2021) 106378.  
96 [8] Y. Cui, K. Yang, F. Zhang, Y. Lyu, Q. Zhang, B. Zhang, Ultra-light MXene/CNTs/PI aerogel with  
97 neat arrangement for electromagnetic wave absorption and photothermal conversion, Composites, Part  
98 A 158 (2022) 106986.  
99 [9] L. Wang, H. Liu, X. Lv, G. Cui, G. Gu, Facile synthesis 3D porous MXene  $Ti_3C_2T_x@RGO$  composite  
100 aerogel with excellent dielectric loss and electromagnetic wave absorption, J. Alloys Compd. 828 (2020)  
101 154251.  
102
